# Supplementary material
Source: PubMed Central journal article supplement (PMC8419030)
Supplement: NIHMS1693199-supplement-1.pdf [file NIHMS1693199-supplement-1.pdf]

**Supplementary Table S1-S4, Supplementary Figures S1-S11**

| Characteristic                      | Number of Patients | Percent of Patients |
|-------------------------------------|--------------------|---------------------|
| <b>Primary malignancy</b>           |                    |                     |
| B-cell Acute Lymphoblastic Leukemia | 70                 | 98.6% [91.3–99.9]   |
| Hodgkin Lymphoma                    | 1                  | 1.4% [0.1–8.7]      |
| <b>Age</b>                          |                    |                     |
| 0-1                                 | 1                  | 1.4% [0.1–8.7]      |
| 2-10                                | 31                 | 43.7% [32.1–55.9]   |
| 11-17                               | 23                 | 32.4% [22.0–44.7]   |
| ≥ 18                                | 16                 | 22.5% [13.8–34.3]   |
| <b>Sex</b>                          |                    |                     |
| Female                              | 34                 | 47.9% [36.0–60.0]   |
| Male                                | 37                 | 52.1% [40.0–64.0]   |
| <b>Duration of B-cell Aplasia</b>   |                    |                     |
| < 6 months                          | 27                 | 38.0% [27.0-50.4]   |
| ≥ 6 months                          | 33                 | 46.5% [34.7-58.6]   |
| Censored before 6 months            | 11                 | 15.5% [8.4-26.5]    |

**Supplementary Table S1. Clinical characteristics of 71 children and young adults enrolled to receive anti-CD19 CAR T-cell therapy.** T-cells from 71 patients were acquired by apheresis with the intent to manufacture and deliver anti-CD19 CAR T-cell therapy. Mean values and 95% confidence intervals are shown.

**Supplementary Table S2. Differentially expressed genes between T-cell subtypes and clinical CAR T-cell persistence groups.** Differential expression analysis was performed on RNA-Seq data with Limma. The first sheet contains genes ranked by p-value from the ANOVA model with the null hypothesis of equal expression across the five T-cell subsets. Subsequent sheets show the output of a mixed effects model including T-cell subtype and clinical CAR T-cell persistence group. Sheets 2-10 consist of comparisons between T-cell subsets, and sheets 11-19 consist of comparisons between patients with long (≥ 6 month) vs short (< 6 month) CAR T-cell persistence.

**Supplementary Table S3. Gene sets for the TCF7 regulon and interferon response.** For each gene set, three annotations are provided: the Ensembl gene id, the Entrez gene id, and HGNC symbol based on annotation from Ensembl version 94.

**Supplementary Table S4. Primers for 3C-qPCR and RT-qPCR.**

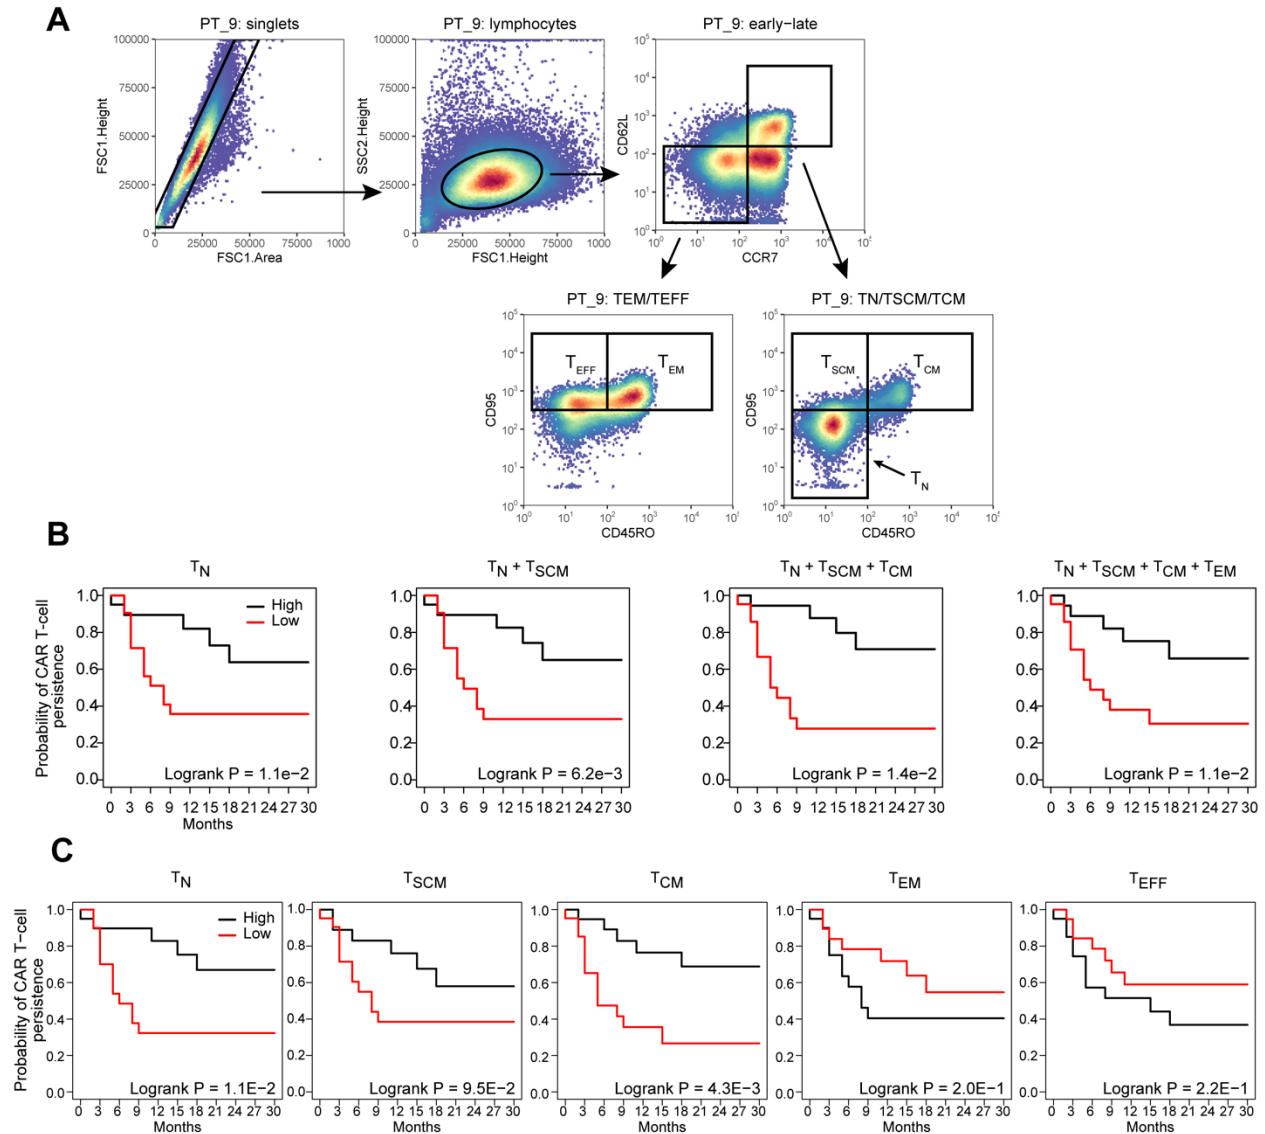

**Supplemental Figure S1. T-cell subtypes associate with clinical response.**

(A) Representative flow cytometry plot for sorting T-cell subpopulations. (B) Association of relative T-cell proportion with clinical CAR T-cell persistence, as assessed by duration of B-cell aplasia (BCA). Patients were median-dichotomized based on proportions of each T-cell subset, or summed proportions of T-cell subsets. (C) Association between proportion of  $T_N$ ,  $T_{SCM}$ ,  $T_{CM}$ ,  $T_{EM}$  and  $T_{EFF}$  at time of leukapheresis with long-term CAR T-cell persistence. P-values were computed using the log-rank test.

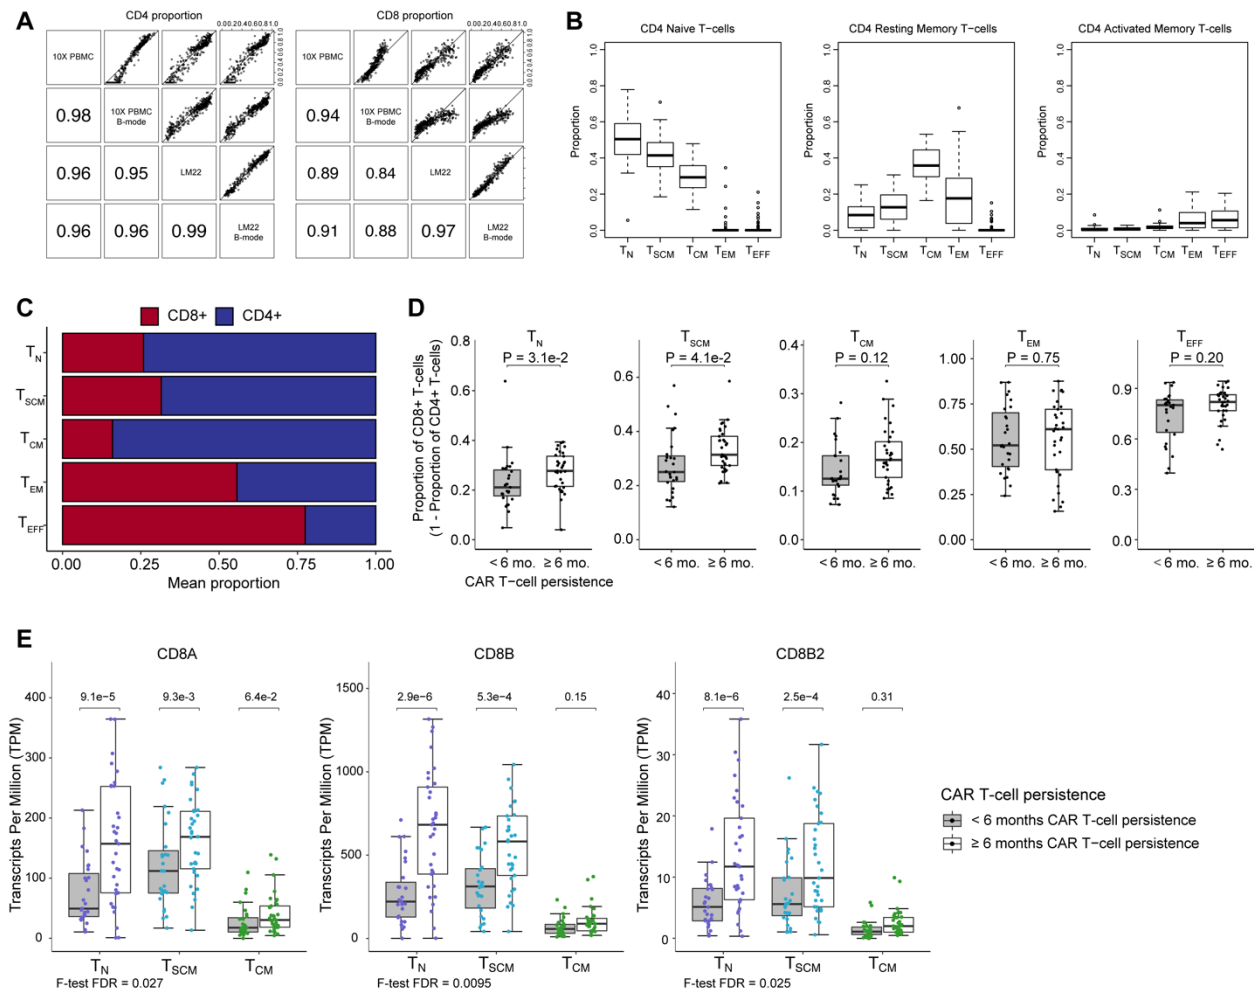

**Supplementary Figure S2. Deconvolution of CD4<sup>+</sup>/CD8<sup>+</sup> T cell proportions.** (A) Assessment of robustness in CIBERSORTx estimates of CD4 and CD8 proportion based on a bulk (LM22) and single-cell (10X) reference, with and without the B-mode parameter. The lower diagonal contains Pearson correlation coefficients. (B) Association with annotated T-cell subsets in the LM22 reference set with T<sub>N</sub>, T<sub>SCM</sub>, T<sub>CM</sub>, T<sub>EM</sub>, and T<sub>EFF</sub> populations. (C) Relative proportions of CD8<sup>+</sup> and CD4<sup>+</sup> T-cells estimated by CIBERSORTx compared across T-cell subtypes (ANOVA P < 2.2e-16). (D) Association between the proportion of CD8<sup>+</sup> T-cells and CAR T-cell persistence. Patients were dichotomized into those with long-term CAR T-cell persistence (≥ 6 months, n=33) and those with failed CAR T-cell persistence (< 6 months, n=27). Among T<sub>N</sub> and T<sub>SCM</sub>, greater proportions of CD8<sup>+</sup> T-cells associate with longer CAR T-cell persistence; conversely, greater proportions of CD4<sup>+</sup> T-cells among T<sub>N</sub> and T<sub>SCM</sub> associate with shorter CAR T-cell persistence. P-values were computed using the Wilcoxon rank-sum test, and multiple testing correction was performed using the Benjamini-Hochberg procedure. (E) Expression of CD8 genes in T<sub>N</sub>, T<sub>SCM</sub>, and T<sub>CM</sub> populations compared between patients with long-term (≥ 6 month) vs failed (< 6 month) CAR T-cell persistence.

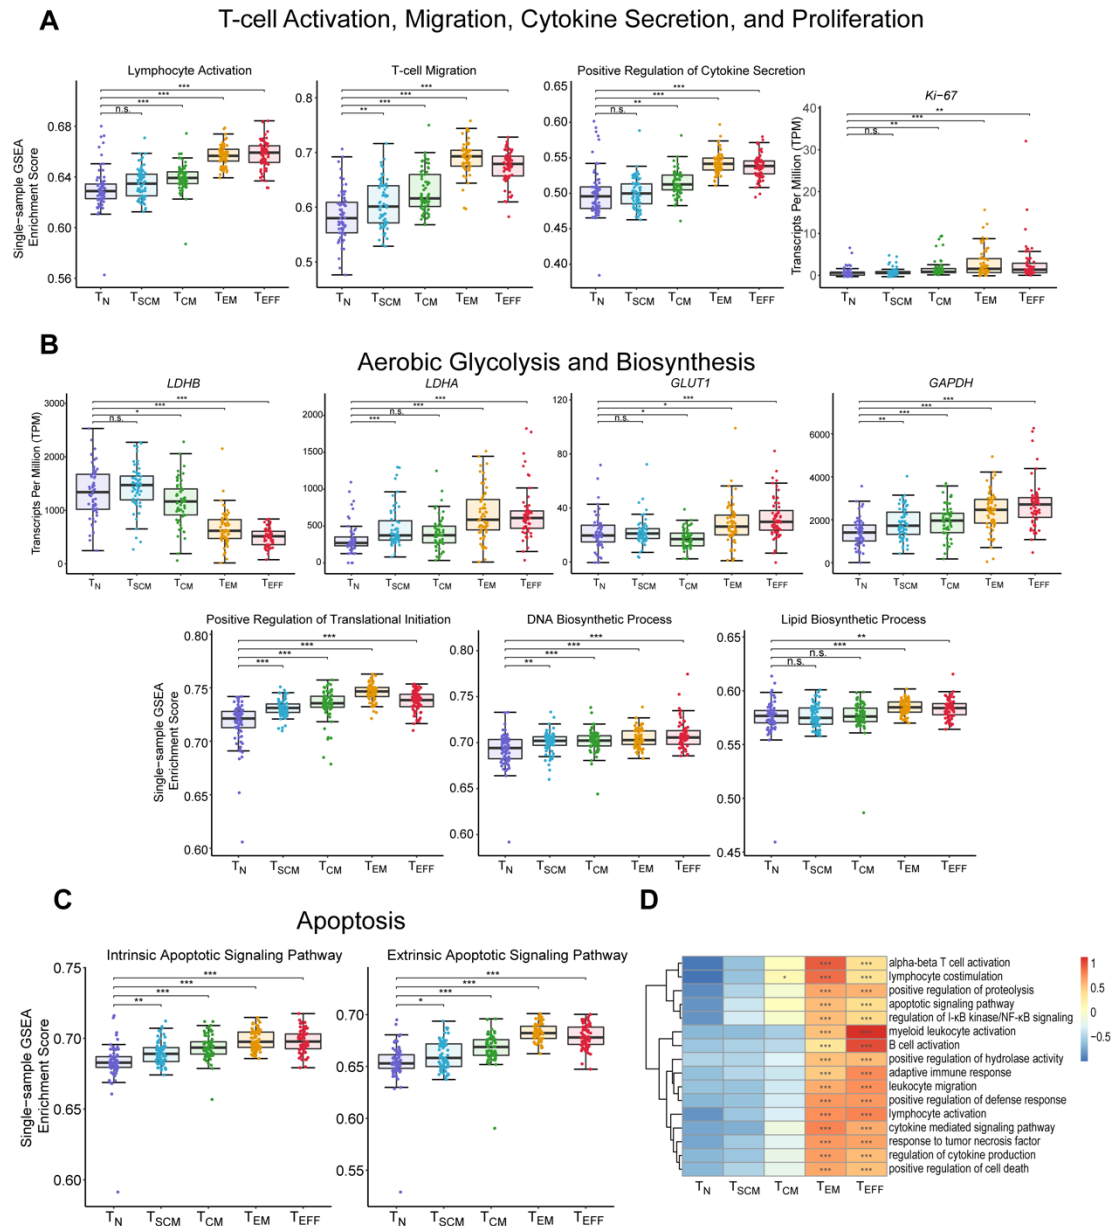

**Supplemental Figure S3. T-cell subtypes differ in activation and proliferation pathways, metabolic reprogramming, and apoptotic pathways.**

(A) Single-sample Gene Set Enrichment Analysis on representative pathways associated with T-cell subtype, and differential expression of *Ki-67*. (B) Single-sample Gene Set Enrichment Analysis and differential gene expression for key markers of aerobic glycolysis and biosynthetic pathways. Pairwise statistical significance was assessed through Welch's t-test. (C) Single-sample Gene Set Enrichment Analysis on intrinsic and extrinsic apoptotic signaling pathways associated with T-cell subtype. Pairwise statistical significance was assessed through Welch's t-test. (D) Heatmap of z-score normalized single-sample gene set enrichment scores of top significantly differentially activated pathways between T-cell subsets. Shown are the gene sets from Fig. 1D that were in the Gene Ontology Biological Pathways database. Asterisks show FDR-corrected p-values. \*\*\*:  $p < 0.001$ ; \*\*:  $p < 0.01$ ; \*:  $0.05$ , n.s.:  $p \geq 0.05$ .

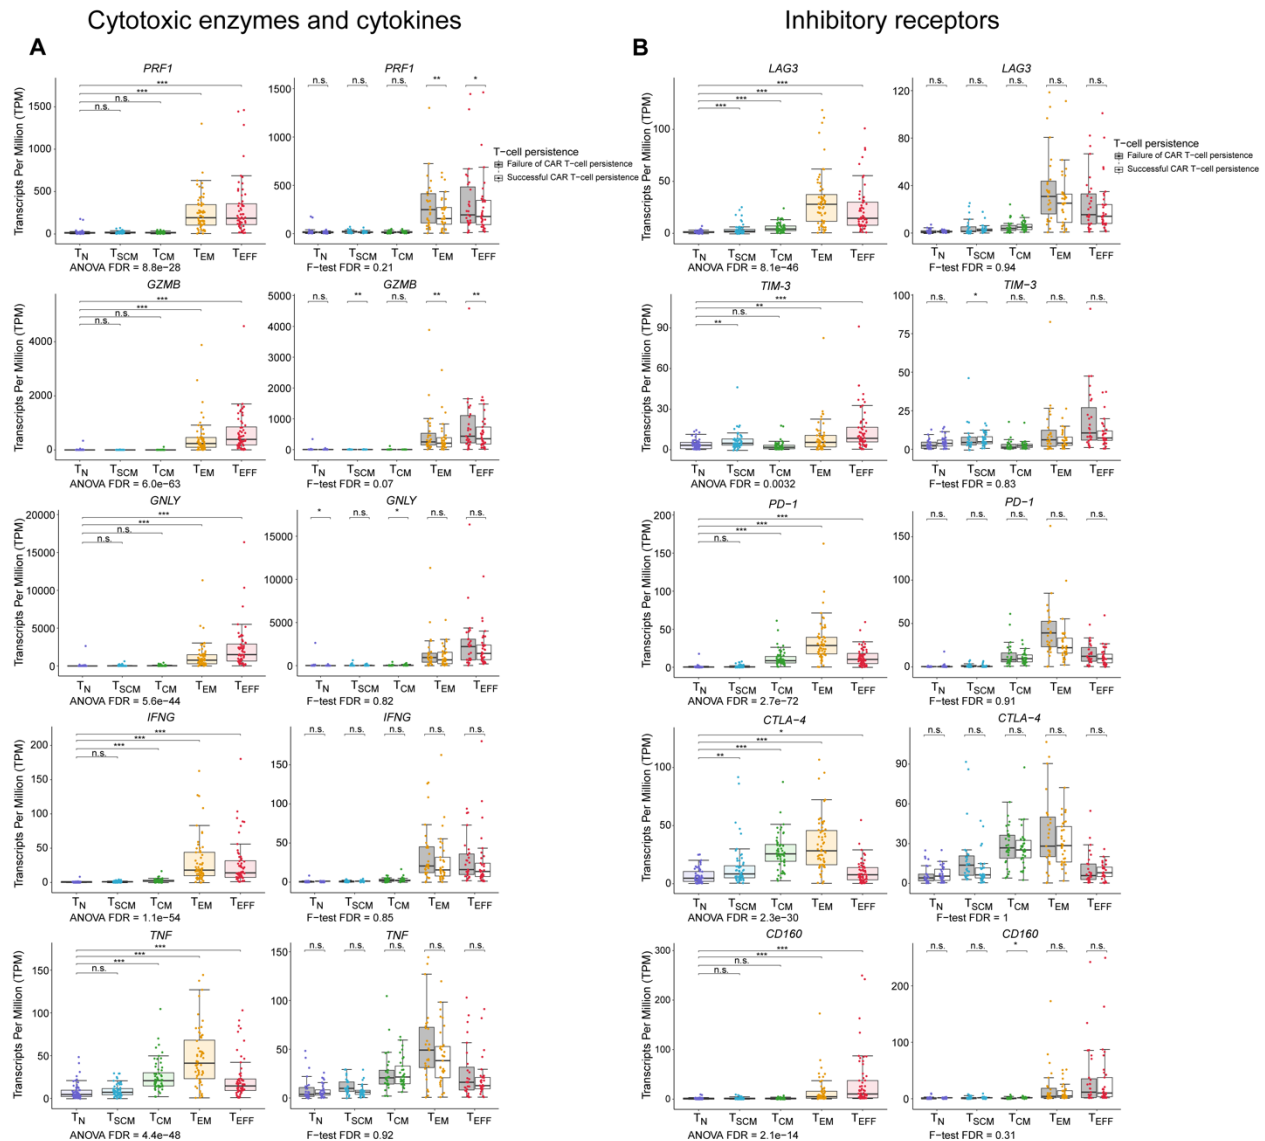

**Supplemental Figure S4. Expression of inhibitory receptors, cytotoxic enzymes, and cytokines across T-cell subtypes and between clinical CAR T-cell persistence groups. (A)** Expression of selected cytokines and genes involved in cytotoxicity. **(B)** Expression of the inhibitory receptors *LAG-3*, *TIM-3*, *PD-1*, *CTLA-4*, and *CD160* differed between T-cell subsets and were highly expressed among  $T_{EM}$  and  $T_{EFF}$ , but did not differ between patients with long-term ( $\geq 6$  month) vs failed ( $< 6$  month) CAR T-cell persistence. Pairwise statistical significance between T-cell subtypes was assessed through Welch's t-test. Pairwise statistical significance between clinical CAR T-cell persistence groups was assessed through the Limma mixed-effects model. \*\*\*:  $p < 0.001$ ; \*\*:  $p < 0.01$ ; \*:  $0.01$ , n.s.:  $p \geq 0.05$ .

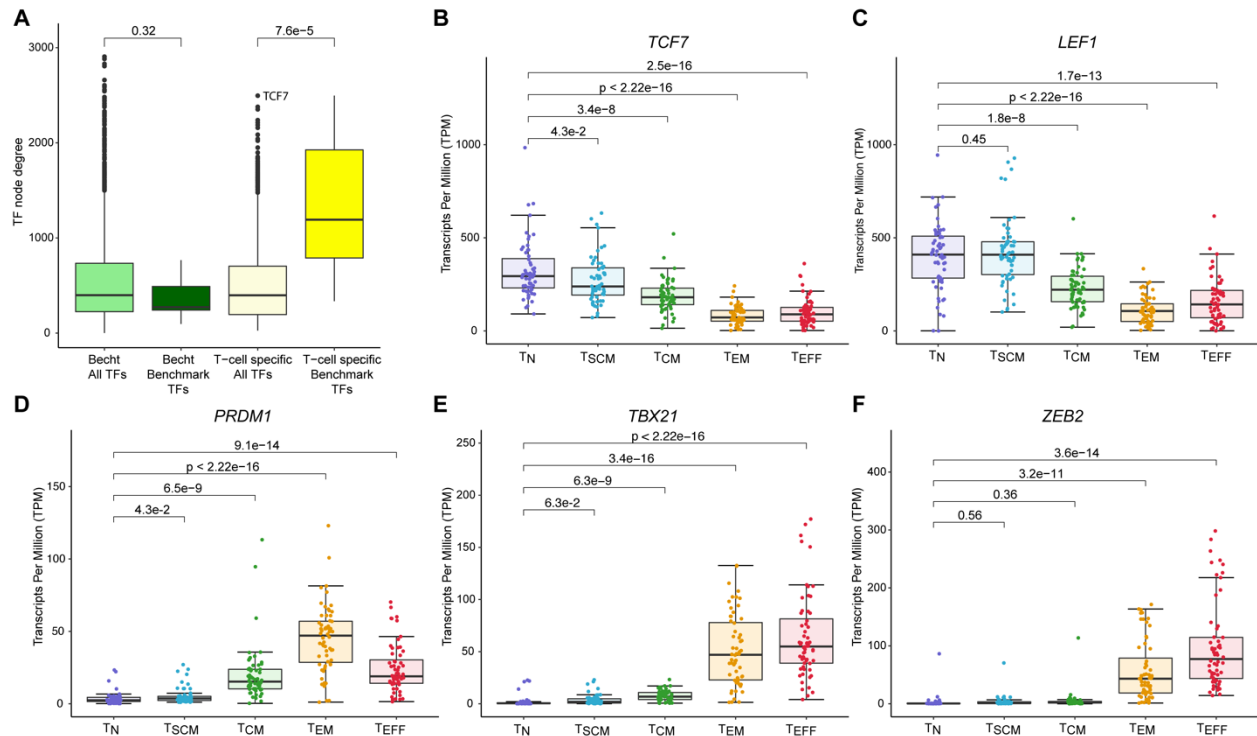

**Supplemental Figure S5. T-cell specific network analysis captures key transcriptional regulators of T-cell subset.** (A) Validation of the T-cell network construction method. Network construction was performed using a compendium of non-T-cell immune populations in Becht et al. (green boxes), as well as with our T-cell RNA-Seq data (yellow boxes). The distribution of TF node degrees was compared between the null population (light-colored boxes) and a set of benchmark TFs consisting of a set of known T-cell transcriptional regulators in Chang et al. (dark-colored boxes). Pairwise comparisons were performed with the Wilcoxon rank-sum test. (B-F) Expression of predicted key regulators of T-cell state: *TCF7*, *LEF1*, *PRDM1*, *TBX21*, and *ZEB2*. Pairwise statistical significance was assessed with Welch's t-test.

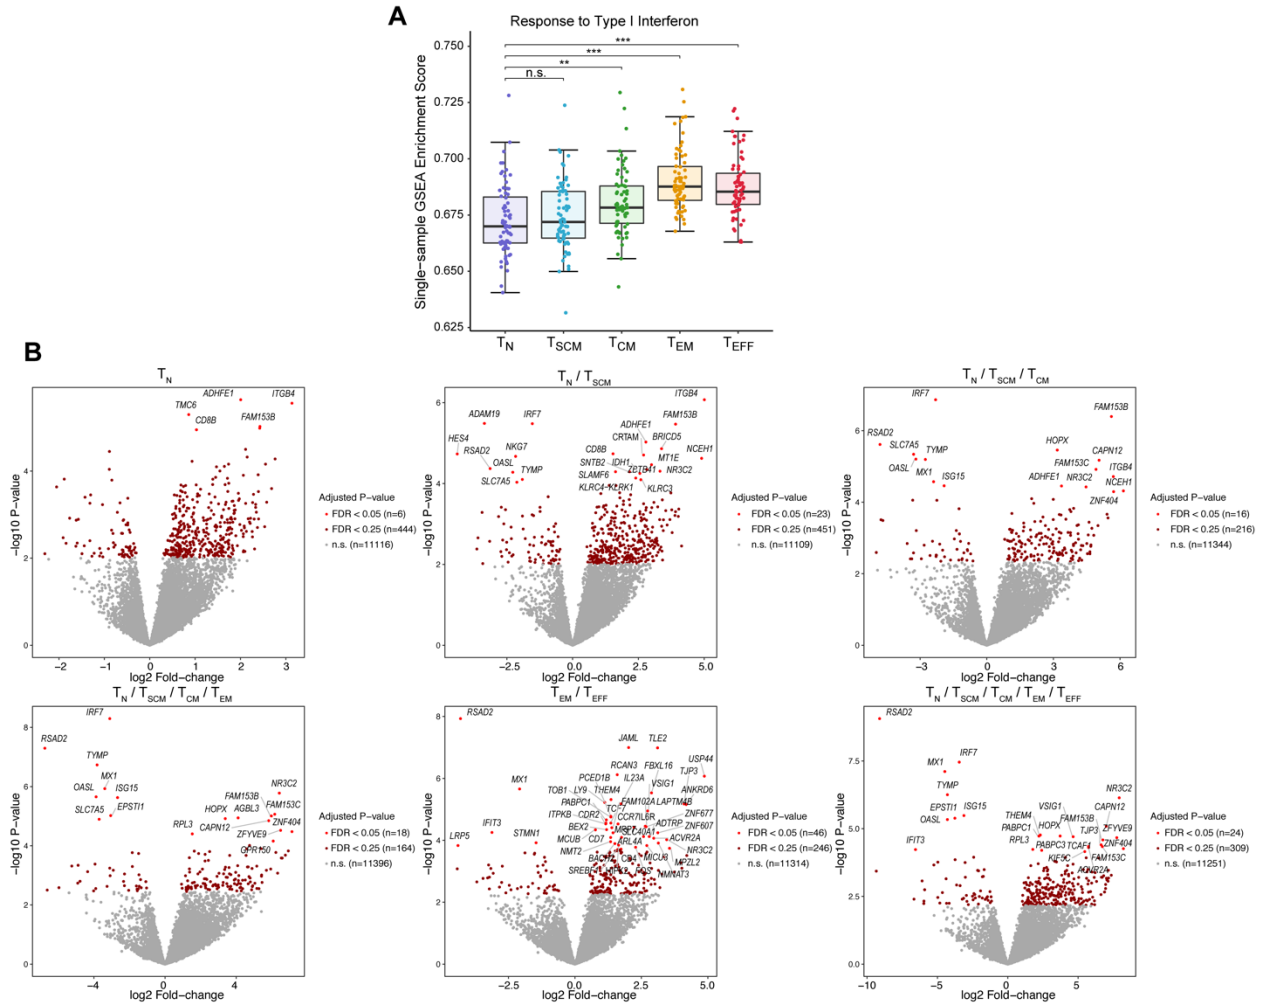

**Supplementary Figure S6. Interferon response genes are up-regulated in patients with poor CAR T-cell persistence across T-cell subtypes. (A)** Single-sample Gene Set Enrichment Analysis comparing the enrichment score of the Gene Ontology Type I Interferon response pathway across T-cell subtypes. P-values were computed using Welch's t-test. **(B)** Volcano plots showing differentially expressed genes in patients with long-term vs short-term CAR T-cell persistence using gene expression data from specific T-cell subsets.



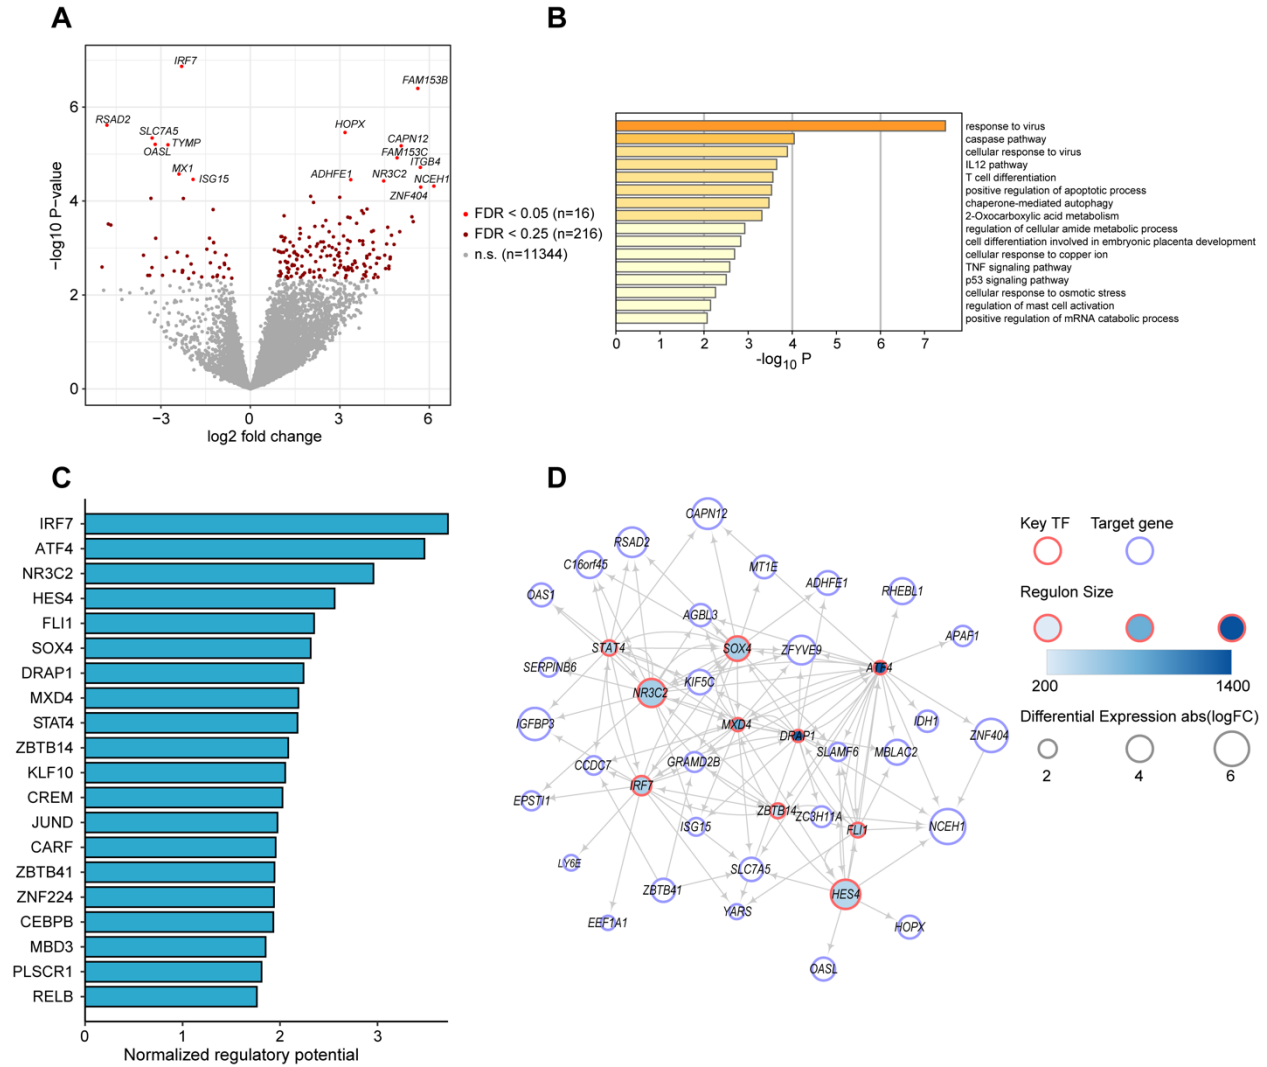

**Supplementary Figure S7. Interferon response genes are up-regulated among patients with poor CAR T-cell persistence in naive and early memory T-cells, and IRF7 is the top predicted transcriptional regulator in these subsets. (A)** Volcano plot showing differentially expressed genes in patients with long-term vs short-term CAR T-cell persistence using gene expression data from  $T_N$ ,  $T_{SCM}$ , and  $T_{CM}$  subsets. **(B)** Enriched pathways among differentially expressed genes between patients with long-term vs short-term CAR T-cell persistence ( $FDR < 0.25$ ). **(C)** Top 20 predicted key transcription factors (TFs) associated with the long-term vs short-term persistence ranked by normalized regulatory potential ( $FDR < 0.05$ ). **(D)** Transcriptional regulatory network of top 10 predicted key TFs from (E) and top 50 target DEGs.

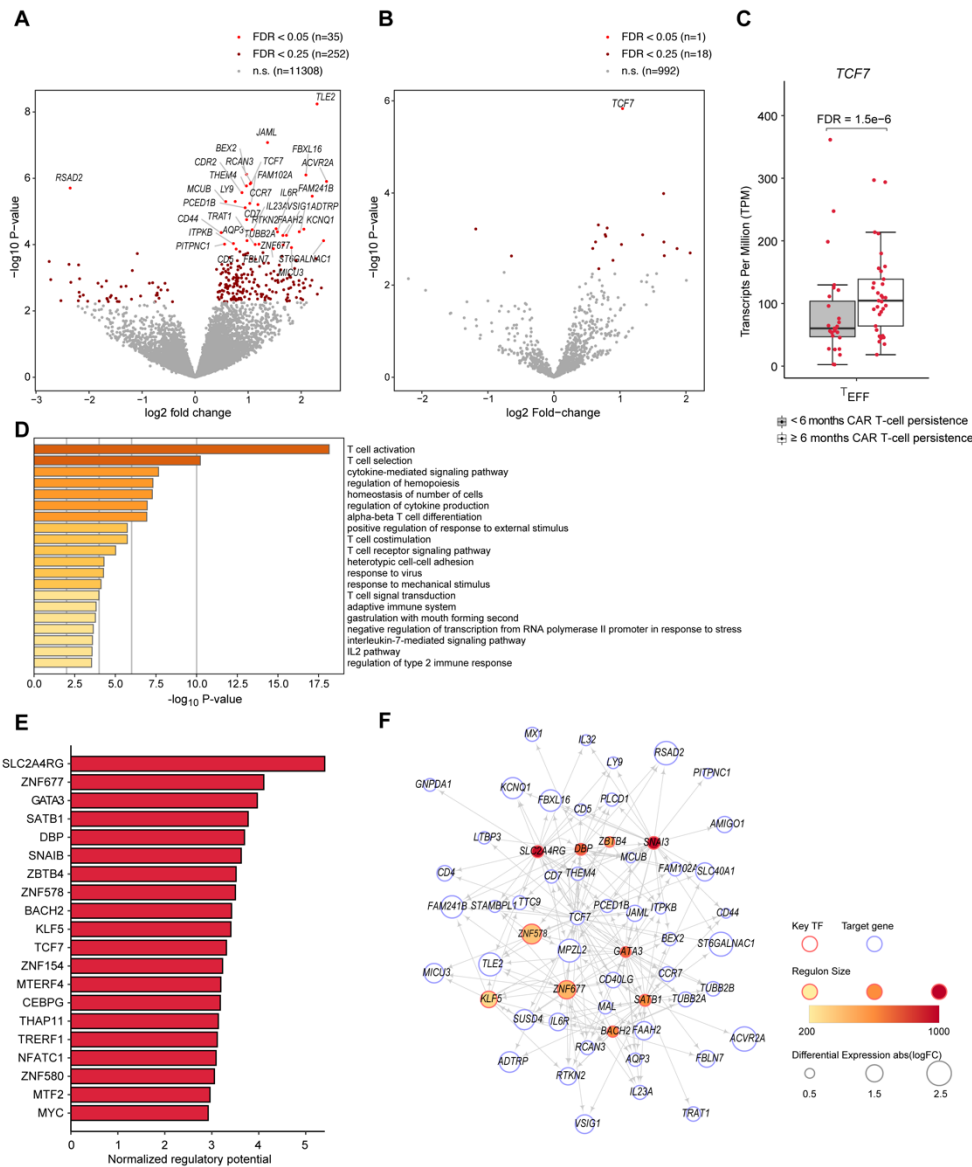

## Supplementary

**Figure S8. Network analysis of T<sub>EFF</sub> alone highlights TCF7 as a regulator of long CAR T-cell persistence.** (A) Volcano plot showing differentially expressed genes in patients with long-term vs short-term CAR T-cell persistence using gene expression data from the T<sub>EFF</sub> subset. (B) Volcano plot showing differentially expressed transcription factors in patients with long-term vs short-term CAR T-cell persistence using gene expression data from the T<sub>EFF</sub> subset. *TCF7* was the most significantly up-regulated transcription factor among patients with long-term CAR T-cell persistence (FDR=0.0015). (C) Differential expression of *TCF7* between patients with long-term (≥ 6 month) vs short-term (< 6 month) CAR T-cell persistence. Statistical significance was assessed with the FDR-adjusted P-value from the Limma mixed-effects interaction model. (D) Enriched pathways among differentially expressed genes between patients with long-term vs short-term CAR T-cell persistence (FDR < 0.25). (E) Top 20 predicted key transcription factors (TFs) associated with the long-term vs short-term persistence ranked by normalized regulatory potential (FDR < 0.05). (F) Transcriptional regulatory network of top 10 predicted key TFs from (E) and top 50 target DEGs.

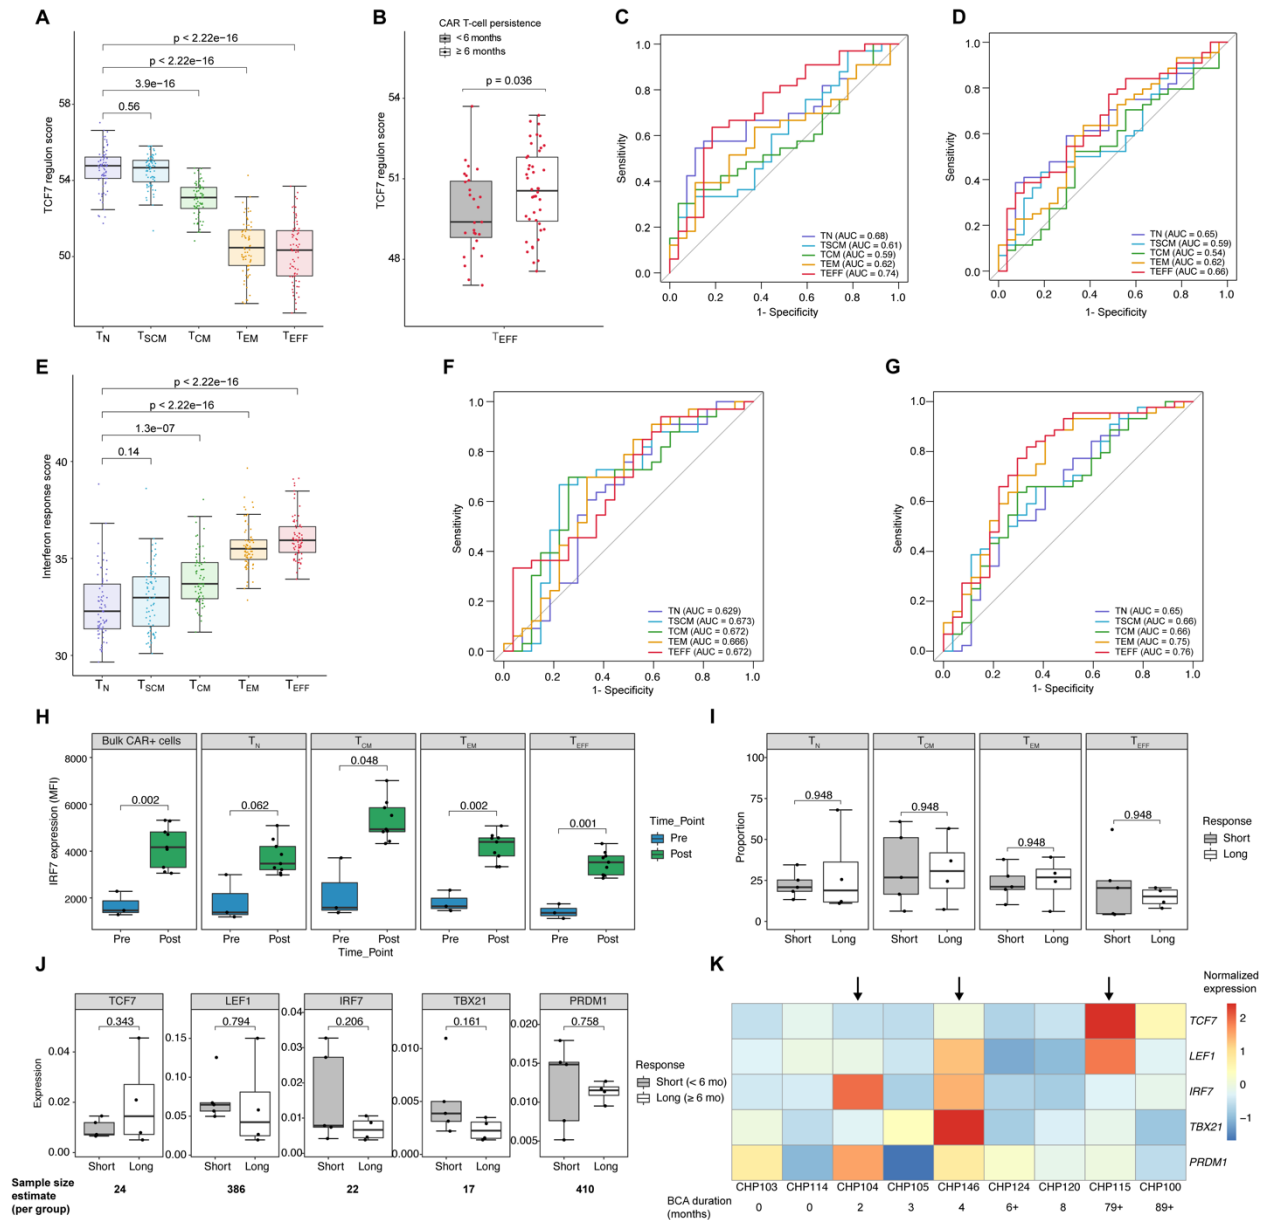

**Supplementary Figure S9. Internal validation of prognostic gene signatures. (A)** Association of the *TCF7* network score with T-cell subset, and with **(B)** clinical CAR T-cell persistence in T<sub>EFF</sub>. Pairwise comparisons were assessed for significance with Welch's t-test. **(C)** Receiver-operating characteristic (ROC) curves to validate the *TCF7* regulon gene signature using leave-one-patient out and **(D)** leave-one-T-cell-type-out cross-validation. Each curve represents the performance of this gene signature when evaluated on left-out samples. **(E)** Association of the interferon response gene signature with T-cell subsets. Pairwise comparisons were assessed for significance with Welch's t-test. **(F)** Receiver-operating characteristic (ROC) curves to validate of the interferon response gene signature discovery method using leave-one-patient-out cross validation and **(G)** leave-one-T-cell-type-out cross validation. Each curve represents the performance of this gene signature when evaluated on left-out samples. **(H)** IRF7 expression assessed by median fluorescent intensity (MFI) from FACS comparing 3 pre-manufacture T-cell

samples and 11 post-manufacture CAR T-cell infusion products from a separate group of patients from those studied in our bulk RNA-Seq analysis. T-cell subsets were defined based on CD62L and CD45RO gating. T<sub>N</sub>: CD62L<sup>+</sup>CD45RO<sup>-</sup>; T<sub>CM</sub>: CD62L<sup>+</sup>CD45RO<sup>+</sup>; T<sub>EM</sub>: CD62L<sup>-</sup>CD45RO<sup>+</sup>; T<sub>EFF</sub>: CD62L<sup>-</sup>CD45RO<sup>-</sup>. **(I)** Assessment of CAR T-cell subset proportion from FACS analysis comparing five patients with short clinical CAR T-cell persistence and four with long-term CAR T-cell persistence. Statistical significance was assessed using Welch's t-test and Benjamini-Hochberg multiple-testing correction. The equal FDR-adjusted p-values in some plots were a result of ties in the Benjamini-Hochberg procedure. **(J)** Assessment of transcription factor expression by RT-qPCR relative to *ACTB* control between the five patients with short clinical CAR T-cell persistence and four with long-term CAR T-cell persistence. Statistical significance was assessed using Welch's t-test. Sample size estimates per group are shown for a significance level of 0.05 and 80% power. FDR-adjusted p-values were 0.572, 0.794, 0.515, 0.515, and 0.794 respectively. **(K)** Heatmap indicating transcription factor expression by RT-qPCR with arrows indicating CHP104 (a patient with failed CAR T persistence at 2 months and high *IRF7* and *PRDM1* expression); CHP146 (a patient with failed CAR T persistence at 4 months and high *TBX21* expression); and CHP115 (a patient with > 6.5 years of CAR T persistence and high *TCF7/LEF1* expression in the CAR T infusion product). For plotting purposes, expression values for each gene were z-score normalized across patients.

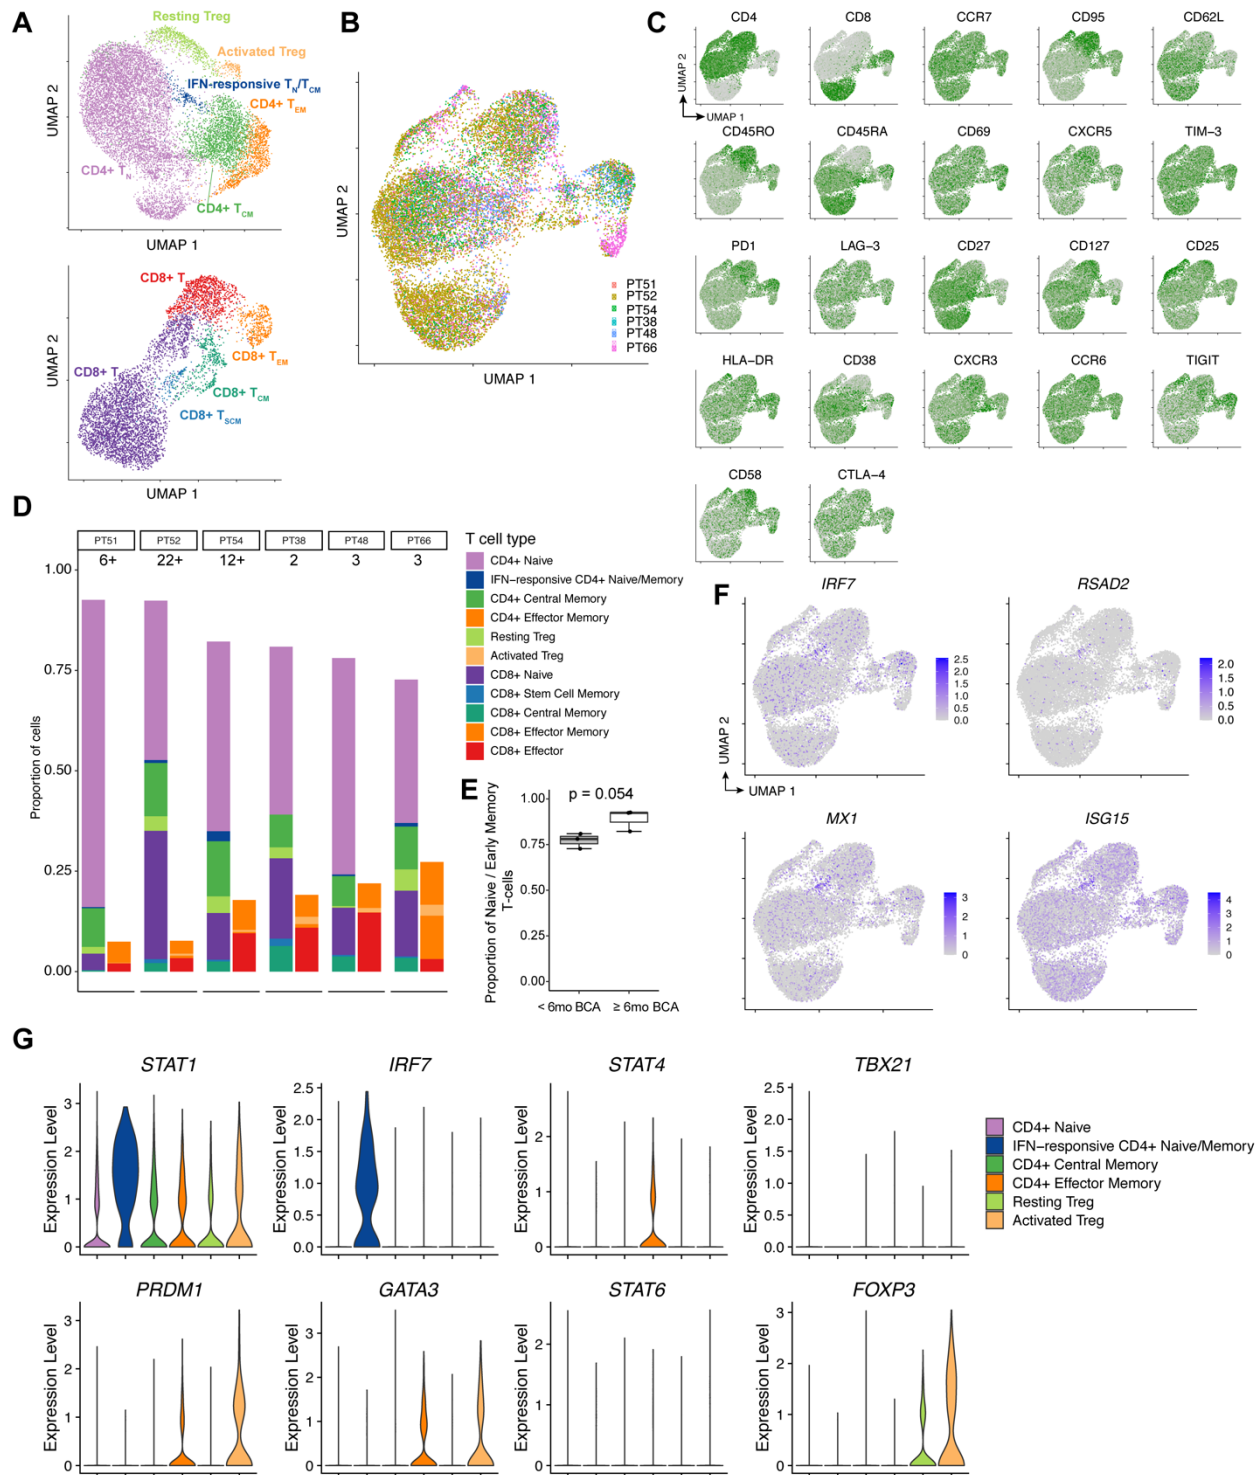

**Supplementary Figure S10. Analysis of CITE-Seq data.** (A) UMAP of CD4<sup>+</sup> (top panel) and CD8<sup>+</sup> (bottom panel) T-cells, colored by T-cell cluster. (B) UMAP of 17,750 cells from CITE-Seq data, colored by patient. (C) UMAP of CITE-Seq data, colored by cell surface protein expression of 22 markers based on CITE-Seq antibody-derived tags. (D) Proportions of T-cell subsets within each patient, determined by relative numbers of cells per cluster. The number below each patient identifier is the duration of CAR T-cell persistence for each respective

patient, with censored values indicated with a plus symbol, and T-cell types are stratified by naive and early memory (purple, blue, and green shades) compared to effector memory and effector T-cells (orange and red shades). **(E)** Boxplot showing the proportion of naive and early memory T-cells ( $CD4^+$  and  $CD8^+$   $T_N$ ,  $T_{SCM}$ ,  $T_{CM}$ , and resting  $T_{reg}$ ) among the three patients with  $\geq 6$  months BCA compared to the three patients with  $< 6$  months BCA. Statistical significance was assessed with Welch's t-test. **(F)** Normalized RNA expression of representative type I interferon response genes. **(G)** Expression of transcription factors associated with  $CD4^+$  subsets in our single-cell data. *STAT1* and *IRF7* were up-regulated among the IFN-responsive Naive/Memory subset, with low *STAT1* expression among other subsets; *STAT4*, *PRDM1*, and *GATA3* were expressed among the  $CD4^+$   $T_{EM}$  subset; and *PRDM1*, *GATA3*, and *FOXP3* were expressed among the  $T_{reg}$  cells.

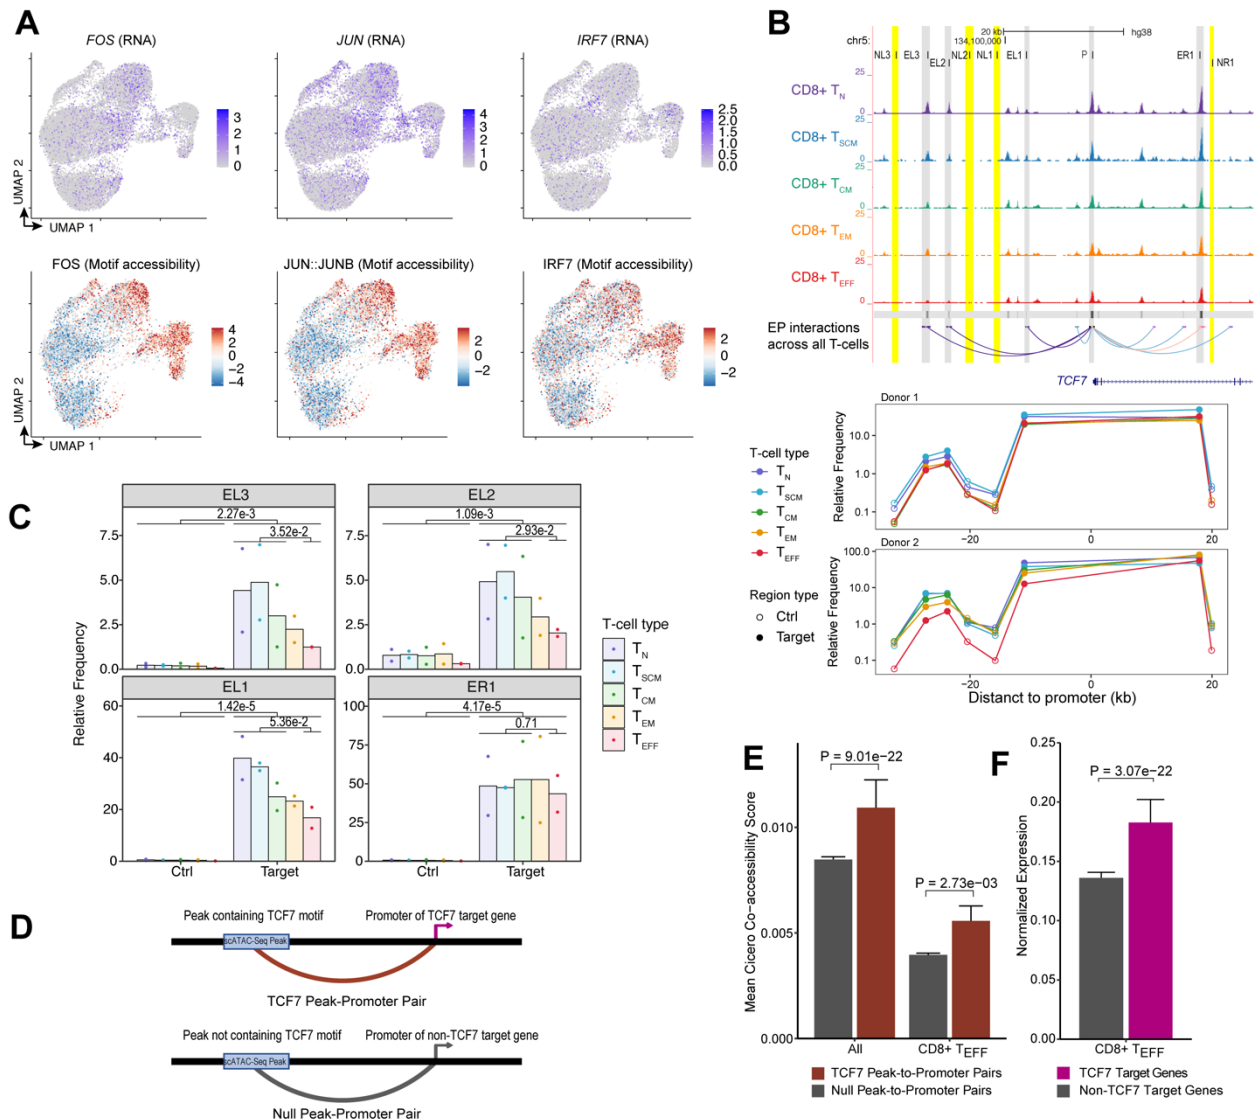

**Supplementary Figure S11. Analysis of scATAC-Seq data to uncover gene regulatory interactions.** (A) Normalized RNA expression and chromVAR motif accessibility of signaling transcription factors *FOS*, *JUN*, and *IRF7*. (B) Top, schematic for primers used in the chromosome conformation capture (3C) experiments of predicted enhancer-promoter interactions involving the *TCF7* promoter. Predicted enhancers (EL3, EL2, EL1, ER1) are highlighted in yellow. Adjacent negative control regions (NL3, NL2, NL1, NR1) and the *TCF7* promoter (P) are highlighted in grey. Bottom, 3C relative interaction frequencies of the tested interactions using T-cell samples from two healthy donors. (C) Bar plots for relative interaction frequencies from 3C experiment comparing each adjacent negative control region (Ctrl) and predicted enhancer (Target) as well as comparing E-P interactions between two groups of T cell subtypes ( $T_N+T_{SCM}+T_{CM}$  vs  $T_{EM}+T_{EFF}$ ). Each point represents the mean of three technical replicates performed on one of two healthy donor samples sorted by T-cell subtype. Pairwise statistical significance was assessed using Welch's t-test. (D) Schematic indicating how *TCF7* and null peak-to-promoter pairs were determined. *TCF7* peak-promoter pairs were defined as pairs of chromatin peaks from Cicero for which one peak contained the *TCF7* motif and did not overlap with a promoter or exon, and the other peak overlapped with a promoter from a gene

within the *TCF7* regulon defined by our bulk RNA-Seq analysis. Null peak-promoter pairs were defined as pairs of chromatin peaks from Cicero for which one peak did not contain the *TCF7* motif and did not overlap with a promoter or exon, and the other peak overlapped with a promoter not within the *TCF7* regulon. **(E)** Enrichment of Cicero co-accessibility scores among *TCF7* peak-promoter pairs compared to null, both in the pan-T-cell analysis and when restricted to the T<sub>EFF</sub> subset. In the pan-T-cell analysis (under the “All” label on the x axis), Cicero was run on all of the T-cells in the scATAC-Seq data, capturing regulatory interactions with and between T-cell subsets. In the T<sub>EFF</sub> analysis, Cicero was run strictly on the CD8<sup>+</sup> T<sub>EFF</sub> subset, capturing only interactions occurring within the T<sub>EFF</sub> cells. Error bars indicate 95% confidence intervals of the mean estimate, and pairwise statistical significance was assessed using the Wilcoxon rank-sum test. **(F)** Normalized RNA expression of *TCF7* target genes compared to non-*TCF7* target genes based on the peak-promoter pairs defined for T<sub>EFF</sub> as described in (B). Genes were included in this analysis if the RNA count was nonzero in greater than 1% of cells. Error bars indicate 95% confidence intervals of the mean estimate, and pairwise statistical significance was assessed using the Wilcoxon rank-sum test.
